# Supplementary material
Source: PubMed Central journal article supplement (PMC7088641)
Supplement: 11655_2020_3192_MOESM1_ESM.pdf [file 11655_2020_3192_MOESM1_ESM.pdf]

Supplementary material to “Can Chinese Medicine Be Used for Prevention of Corona Virus Disease 2019 (COVID-19)? A Review of Historical Classics, Research Evidence and Current Prevention Programs” written by LUO Hui, TANG Qiao-ling, SHANG Ya-xi, LIANG Shi-bing, YANG Ming, Nicola Robinson, and LIU Jian-ping published in Chinese Journal of Integrative Medicine (DOI: <https://doi.org/10.1007/s11655-020-3192-6>)

Appendix 1. Characteristics of Chinese Medicine Prevention Recommendations for COVID-19 Issued by 23 Provinces in Mainland China

| Region     | Province     | Date      | Applicable population                                                                                                                          | Number of formulae | Composition of formula (Chinese characters / Latin / Pinyin / dosage) for general population                                                                                                                                                                                                                                            | Course | Edition | Source                                                                                                                                        |
|------------|--------------|-----------|------------------------------------------------------------------------------------------------------------------------------------------------|--------------------|-----------------------------------------------------------------------------------------------------------------------------------------------------------------------------------------------------------------------------------------------------------------------------------------------------------------------------------------|--------|---------|-----------------------------------------------------------------------------------------------------------------------------------------------|
| North east | Heilongjiang | 2020/2/1  | General population; elderly; children                                                                                                          | 8                  | 金银花 <i>Lonicerae Japonicae Flos</i> (Jinyinhua) 15g, 连翘 <i>Fructus Forsythiae</i> (Lianqiao) 15g, 生白术 <i>Rhizoma Atractylodis Macrocephalae</i> (Shengbaizhu) 15g, 佩兰 <i>Eupatorium fortunei</i> (Peilan) 10g, 桑叶 <i>Folium Mori</i> (Sangye) 10g, 桔梗 <i>Radix Platycodonis</i> (Jiegeng) 10g, 甘草 <i>Radix Glycyrrhizae</i> (gancao) 5g | NR     | 2nd     | <a href="https://m.dbw.cn/heilongjiang/system/2020/02/02/058330150.shtml">https://m.dbw.cn/heilongjiang/system/2020/02/02/058330150.shtml</a> |
| North      | Beijing      | 2020/1/29 | General population with difference TCM constitution; children; population in close contact with COVID-19 patients; population with comorbidity | 4                  | 麦冬 <i>Radix Ophiopogonis</i> (Maidong) 3g, 桑叶 <i>Folium Mori</i> (Sangye) 3g, 菊花 <i>Flos Chrysanthemi</i> (Juhua) 3g, 陈皮 <i>Citri Reticulatae Pericarpium</i> (Chenpi) 2g                                                                                                                                                               | 6 d    | 2nd     | <a href="http://zyj.beijing.gov.cn/sy/tzgg/202001/t20200130_1621630.html">http://zyj.beijing.gov.cn/sy/tzgg/202001/t20200130_1621630.html</a> |

|         |               |                                                                                                                     |   |                                                                                                                                                                                                                                                                                                                                                                                                                                                                                                                                                                                                                                                                                                                |        |     |                                                                                                                                   |
|---------|---------------|---------------------------------------------------------------------------------------------------------------------|---|----------------------------------------------------------------------------------------------------------------------------------------------------------------------------------------------------------------------------------------------------------------------------------------------------------------------------------------------------------------------------------------------------------------------------------------------------------------------------------------------------------------------------------------------------------------------------------------------------------------------------------------------------------------------------------------------------------------|--------|-----|-----------------------------------------------------------------------------------------------------------------------------------|
| Tianjin | 2020/<br>1/29 | diseases<br>General population with difference TCM constitution; population in close contact with COVID-19 patients | 4 | 柴胡 <i>Radix Bupleuri</i> (Chaihu) 18g, 黄芩 <i>Radix Scutellariae</i> (Huangqin) 12g, 枳壳 <i>Fructus Aurantii</i> (Zhiqiao) 12g, 桔梗 <i>Radix Platycodonis</i> (Jiegeng) 10g, 厚朴 <i>Cortex Magnoliae Officinalis</i> (Houpu) 12g, 槟榔 <i>Semen Arecae</i> (Binlang) 18g, 金银花 <i>Lonicerae Japonicae Flos</i> (Jinyinhua) 15g, 贯众 <i>Cyrtomium fortune J. Sm.</i> (Guanzhong) 10g, 草果 <i>Fructus Tsaoko</i> (Caoguo) 6g, 青皮 <i>Pericarpium Citri Reticulatae Viride</i> (Qingpi) 6g, 佩兰 <i>Eupatorium fortunei</i> (Peilan) 10g, 荷梗 <i>Petiolus Nelumbinis</i> (Hegeng) 6g, 生黄芪 <i>Radix Astragali seu Hedysari</i> (Shenghuangqi) 18g, 炙甘草 <i>Glycyrrhizae Radix Et Rhizoma Praeparata Cum Melle</i> (Zhigancao) 6g | 5-14 d | 2nd | <a href="http://www.tjnk.gov.cn/att/0/10/04/16/10041623_922951.pdf">http://www.tjnk.gov.cn/att/0/10/04/16/10041623_922951.pdf</a> |
| Hebei   | 2020/<br>1/31 | General population; elderly; children; pregnant women                                                               | 8 | 黄芪 <i>Radix Astragali seu Hedysari</i> (Huangqi) 15g, 连翘 <i>Fructus Forsythiae</i> (Lianqiao) 9g, 麦冬 <i>Radix Ophiopogonis</i> (Maidong) 10g, 苍术 <i>Atractylodis Rhizoma</i> (Cangzhu) 12g, 桔梗 <i>Radix Platycodonis</i> (Jiegeng) 9g, 甘草 <i>Radix Glycyrrhizae</i> (Gancao) 6g, 藿香 <i>Herba Agastaches</i> (Huoxiang) 9g                                                                                                                                                                                                                                                                                                                                                                                      | NR     | 3rd | <a href="http://www.hebwst.gov.cn/apps/cms/docforward.do?id=396033">http://www.hebwst.gov.cn/apps/cms/docforward.do?id=396033</a> |
| Shanxi  | 2020/<br>2/1  | General population with difference TCM constitution                                                                 | 2 | 生黄芪 <i>Astragalus mongholicus Bunge</i> (Shenghuangqi) 12g, 白术 <i>Rhizoma Atractylodis Macrocephalae (baizhu)</i> 9g, 防风 <i>Saposhnikoviae Radix</i> (Fangfeng) 9g, 藿香 <i>Herba Agastaches</i> (Huoxiang) 6g, 北沙参 <i>Radix Glehniae</i> (Beishashen) 12g, 金银花 <i>Lonicerae Japonicae Flos</i> (Jinyinhua) 9g, 百合 <i>Bulbus Lilii</i> (Baihe) 12g, 贯众 <i>Cyrtomium fortunei J. Sm.</i> (Guanzhong)                                                                                                                                                                                                                                                                                                              | NR     | 1st | <a href="http://www.sx.chinanews.com/news/2020/0201/162758.html">http://www.sx.chinanews.com/news/2020/0201/162758.html</a>       |

|         |        |               |                                                                                                                  |     |    |                                                                                                                                                                                                                                                                                                                                                                                                                |        |     |                                                                                                                                                         |
|---------|--------|---------------|------------------------------------------------------------------------------------------------------------------|-----|----|----------------------------------------------------------------------------------------------------------------------------------------------------------------------------------------------------------------------------------------------------------------------------------------------------------------------------------------------------------------------------------------------------------------|--------|-----|---------------------------------------------------------------------------------------------------------------------------------------------------------|
| Central | Henan  | 2020/<br>1/27 | General population with difference in constitution; children; population in close contact with COVID-19 patients | TCM | 10 | 6g, 连翘 <i>Fructus Forsythiae</i> (Lianqiao) 9g<br>生黄芪 <i>Astragalus mongholicus</i> Bunge (Shenghuangqi) 9g, 射干 <i>Rhizoma Belamcandae</i> (Shegan) 5g, 北沙参 <i>Radix Glehniae</i> (Beishashen) 9g, 金银花 <i>Lonicerae Japonicae Flos</i> (Jinyinhua) 9g, 苍术 <i>Atractylodis Rhizoma</i> (Cangzhu) 9g, 藿香 <i>Herba Agastaches</i> (Huoxiang) 6g, 贯众 <i>Cyrtomium fortunei</i> J. Sm. (Guanzhong) 5g               | 6 d    | 1st | <a href="http://www.lywwj.gov.cn/bencandy.php?fid=146&amp;id=14268">http://www.lywwj.gov.cn/bencandy.php?fid=146&amp;id=14268</a>                       |
|         | Hubei  | 2020/<br>1/23 | General population; children                                                                                     |     | 2  | 生黄芪 <i>Astragalus mongholicus</i> Bunge (Shenghuangqi) 10g, 白术 <i>Rhizoma Atractylodis Macrocephalae</i> (Baizhu) 10g, 防风 <i>Saposhnikoviae Radix</i> (Fangfeng) 10g, 贯众 <i>Cyrtomium fortunei</i> J. Sm. (Guanzhong) 6g, 金银花 <i>Lonicerae Japonicae Flos</i> (Jinyinhua) 10g, 佩兰 <i>Eupatorium fortunei</i> (Peilan) 10g, 陈皮 <i>Citri Reticulatae Pericarpium</i> (Chenpi) 6g                                 | 7-10 d | 2nd | <a href="http://feng.ifeeng.com/c/7tWzQkkpuQm">http://feng.ifeeng.com/c/7tWzQkkpuQm</a>                                                                 |
|         | Hunan  | 2020/<br>2/3  | General population with difference in constitution                                                               | TCM | 2  | 黄芪 <i>Radix Astragali seu Hedysari</i> (Huangqi) 15g, 桂枝 <i>Ramulus Cinnamomi</i> (Guizhi) 10g, 白芍 <i>Radix Paeoniae Alba</i> (Baishao) 10g, 苍术 <i>Atractylodis Rhizoma</i> (Cangzhu) 10g, 防风 <i>Saposhnikoviae Radix</i> (Fangfeng) 10g, 葛根 <i>Radix Puerariae</i> (Gegen) 15g, 干姜 <i>Rhizoma Zingiberis</i> (Ganjiang) 10g, 甘草 <i>Radix Glycyrrhizae</i> (Gancao) 10g, 大枣 <i>Fructus Jujubae</i> (Dazao) 10g | 3 d    | 3rd | <a href="http://tcm.hunan.gov.cn/tcm/xxgk/tzgg/202002/t20200203_11168981.html">http://tcm.hunan.gov.cn/tcm/xxgk/tzgg/202002/t20200203_11168981.html</a> |
|         | Hainan | 2020/<br>2/3  | General population                                                                                               |     | 1  | 黄芪 <i>Radix Astragali seu Hedysari</i> (Huangqi) 20g, 白术 <i>Rhizoma Atractylodis Macrocephalae</i> (Baizhu) 15g, 防风                                                                                                                                                                                                                                                                                            | NR     | 2nd | <a href="http://wannin.g.hainan.gov.cn/wanning/r">http://wannin.g.hainan.gov.cn/wanning/r</a>                                                           |

|      |          |           |                                                                                                            |   |                                                                                                                                                                                                                                                                                                                                                                                                                                                                                                                  |     |     |                                                                                                                                       |
|------|----------|-----------|------------------------------------------------------------------------------------------------------------|---|------------------------------------------------------------------------------------------------------------------------------------------------------------------------------------------------------------------------------------------------------------------------------------------------------------------------------------------------------------------------------------------------------------------------------------------------------------------------------------------------------------------|-----|-----|---------------------------------------------------------------------------------------------------------------------------------------|
|      |          |           |                                                                                                            |   | <i>Saposhnikovia Radix</i> (Fangfeng) 10g, 赤芍 <i>Radix Paeoniae Rubra</i> (Chishao) 10g, 连翘 <i>Fructus Forsythiae</i> (Lianqiao) 10g, 板蓝根 <i>Radix Isatidis</i> (Banlangen) 15g, 甘草 <i>Radix Glycyrrhizae</i> (Gancao) 10g                                                                                                                                                                                                                                                                                       |     |     | <a href="http://dzt/fkyq/kpzs/202002/t20200205_2744485.html">dzt/fkyq/kpzs/202002/t20200205_2744485.html</a>                          |
|      | Guangxi  | 2020/1/31 | General population; children; population in close contact with COVID-19 patients                           | 3 | 苍术 <i>Atractylodis Rhizoma</i> (Cangzhu) 10g, 苏叶 <i>Folium Perillae</i> (Suye) 10g, 陈皮 <i>Citri Reticulatae Pericarpium</i> (Chenpi) 10g, 葛根 <i>Radix Puerariae</i> (Gegen) 10g, 板蓝根 <i>Radix Isatidis</i> (Banlangen)10g, 生姜 <i>Rhizoma Zingiberis Recens</i> (Shengjiang) 20g                                                                                                                                                                                                                                  | NR  | 1st | <a href="http://gx.people.com.cn/n2/2020/0131/c179430-33753679.html">http://gx.people.com.cn/n2/2020/0131/c179430-33753679.html</a>   |
| East | Jiangxi  | 2020/2/5  | General population                                                                                         | 2 | 生黄芪 <i>Astragalus mongholicus Bunge</i> (Shenghuangqi) 12g, 防风 <i>Saposhnikovia Radix</i> (Fangfeng) 10g, 白术 <i>Rhizoma Atractylodis Macrocephalae</i> (Baizhu) 10g, 银花 <i>Lonicerae Japonicae Flos</i> (Yinhua) 10g, 连翘 <i>Fructus Forsythiae</i> (Lianqiao) 10g, 贯众 <i>Cyrtomium fortune J. Sm.</i> (Guanzhong) 6g, 佩兰 <i>Eupatorium fortunei</i> (Peilan) 10g, 陈皮 <i>Citri Reticulatae Pericarpium</i> (Chenpi) 10g, 苍术 <i>Atractylodis Rhizoma</i> (Cangzhu) 10g, 桔梗 <i>Radix Platycodonis</i> (Jiegeng) 10g | NR  | 2nd | <a href="http://wjw.yicun.gov.cn/news-show-562908.html">http://wjw.yicun.gov.cn/news-show-562908.html</a>                             |
|      | Shandong | 2020/1/28 | General population; elderly; children; population in close contact with COVID-19 patients; population with | 9 | 黄芪 <i>Radix Astragali seu Hedysari</i> (Huangqi) 10g, 白术 <i>Rhizoma Atractylodis Macrocephalae</i> (Baizhu) 10g, 防风 <i>Saposhnikovia Radix</i> (Fangfeng) 6g, 太子参 <i>Radix Pseudostellariae</i> (Taizishen) 12g, 麦冬 <i>Radix Ophiopogonis</i>                                                                                                                                                                                                                                                                    | 5 d | 1st | <a href="http://jnjj.jing.gov.cn/art/2020/1/29/art14566_2442287.html">http://jnjj.jing.gov.cn/art/2020/1/29/art14566_2442287.html</a> |

|          |           |                                                                    |   |                                                                                                                                                                                                                                                                                                                                                                                                                                                                                                                                                                                                                |    |     |                                                                                                                                                                               |
|----------|-----------|--------------------------------------------------------------------|---|----------------------------------------------------------------------------------------------------------------------------------------------------------------------------------------------------------------------------------------------------------------------------------------------------------------------------------------------------------------------------------------------------------------------------------------------------------------------------------------------------------------------------------------------------------------------------------------------------------------|----|-----|-------------------------------------------------------------------------------------------------------------------------------------------------------------------------------|
|          |           | comorbidity diseases; pregnant women; medical staff                |   | (Maidong) 10g, 连翘 <i>Fructus Forsythiae</i> (Lianqiao) 10g, 金银花 <i>Lonicerae Japonicae Flos</i> (Jinyinhua) 15g, 薏苡仁 <i>Semen Coicis</i> (Yiyiren) 12g, 茯苓 <i>Poria</i> (Fuling) 9g, 苏叶 <i>Folium Perillae</i> (Suye) 6g, 炙甘草 <i>Glycyrrhizae Radix Et Rhizoma Praeparata Cum Melle</i> (Zhigancao) 3g                                                                                                                                                                                                                                                                                                         |    |     |                                                                                                                                                                               |
| Zhejiang | NR        | Population in close contact with COVID-19 patients                 | 1 | 金银花 <i>Lonicerae Japonicae Flos</i> (Jinyinhua) 15g, 连翘 <i>Fructus Forsythiae</i> (Lianqiao) 15g, 黄芪 <i>Radix Astragali seu Hedysari</i> (Huangqi) 15g, 防风 <i>Saposhnikoviae Radix</i> (Fangfeng) 10g, 白术 <i>Rhizoma Atractylodis Macrocephalae</i> (Baizhu) 15g, 牛蒡子 <i>Fructus Arctii</i> (Niubangzi) 15g, 芦根 <i>Rhizoma Phragmitis</i> (Lugen) 30g, 甘草 <i>Radix Glycyrrhizae</i> (Gancao) 6g                                                                                                                                                                                                                | NR | 3rd | <a href="http://www.qzszy.com/mobile/info/10093">http://www.qzszy.com/mobile/info/10093</a>                                                                                   |
| Jiangsu  | 2020/1/29 | General population with difference TCM constitution; medical staff | 2 | Formula 1: 党参 <i>Radix Codonopsis</i> (Dangshen), 黄精 <i>Rhizoma Polygonati</i> (Huangjing), 白术 <i>Rhizoma Atractylodis Macrocephalae</i> (baizhu), 陈皮 <i>Citri Reticulatae Pericarpium</i> (Chenpi), 苏叶 <i>Folium Perillae</i> (Suye), 大枣 <i>Fructus Jujubae</i> (Dazao), 炙甘草 <i>Glycyrrhizae Radix Et Rhizoma Praeparata Cum Melle</i> (Zhigancao)<br>Formula 2: 黄芪 <i>Radix Astragali seu Hedysari</i> (Huangqi), 苏叶 <i>Folium Perillae</i> (Suye), 防风 <i>Saposhnikoviae Radix</i> (Fangfeng), 金银花 <i>Lonicerae Japonicae Flos</i> (Jinyinhua), 薄荷 <i>Herba Menthae Heplocalycis</i> (Bohe), 麦冬 <i>Radix</i> | NR | 1st | <a href="http://rd.cnsn.gov.cn/snrd/zfgzdt/202001/5b037c9cddd841d08a95663071e4d21e.shtml">http://rd.cnsn.gov.cn/snrd/zfgzdt/202001/5b037c9cddd841d08a95663071e4d21e.shtml</a> |



|            |         |           |                                                     |   |                                                                                                                                                                                                                                                                                                                                                                                                                                                                                                           |     |     |                                                                                                                                     |
|------------|---------|-----------|-----------------------------------------------------|---|-----------------------------------------------------------------------------------------------------------------------------------------------------------------------------------------------------------------------------------------------------------------------------------------------------------------------------------------------------------------------------------------------------------------------------------------------------------------------------------------------------------|-----|-----|-------------------------------------------------------------------------------------------------------------------------------------|
|            |         |           | close contact with COVID-19 patients; medical staff |   | (Yiyiren) 20g, 金银花 <i>Lonicerae Japonicae Flos</i> (Jinyinhua) 10g, 紫苏叶 <i>Folium Perillae</i> (Zisuye) 6g, 杏仁 <i>Semen Armeniacae Amarum</i> (Xingren) 10g, 桔梗 <i>Radix Platycodonis</i> (Jiegeng) 12g, 芦根 <i>Rhizoma Phragmitis</i> (Lugen)10g, 炙甘草 <i>Glycyrrhizae Radix Et Rhizoma Praeparata Cum Melle</i> (Zhigancao) 6g                                                                                                                                                                            |     |     | <a href="#">tm</a>                                                                                                                  |
| South west | Sichuan | 2020/1/21 | General population; children                        | 1 | 金银花 <i>Lonicerae Japonicae Flos</i> (Jinyinhua) 30g, 连翘 <i>Fructus Forsythiae</i> (Lianqiao) 30g, 芦根 <i>Rhizoma Phragmitis</i> (Lugen) 30g, 竹叶 <i>Lophatheri Herba</i> (Zhuye) 15g, 薄荷 <i>Herba Menthae Heplocalycis</i> (Bohe) 15g, 荆芥 <i>Herba Schizonepetae</i> (Jingjie) 15g, 桔梗 <i>Radix Platycodonis</i> (Jiegeng) 15g, 甘草 <i>Radix Glycyrrhizae</i> (Gancao) 15g, 藿香 <i>Herba Agastaches</i> (Huoxiang) 15g                                                                                        | NR  | 1st | <a href="http://sc.people.com.cn/n2/2020/0121/c345167-33736981.html">http://sc.people.com.cn/n2/2020/0121/c345167-33736981.html</a> |
|            | Yunnan  | 2020/1/25 | General population with difference TCM constitution | 2 | Formula 1: 北沙参 <i>Radix Glehniae</i> (Beishashen) 15g, 桑叶 <i>Folium Mori</i> (Sangye) 9g, 金银花 <i>Lonicerae Japonicae Flos</i> (Jinyinhua) 9g, 菊花 <i>Flos Chrysanthemi</i> (Juhua) 9g, 桔梗 <i>Radix Platycodonis</i> (Jiegeng) 9g, 甘草 <i>Radix Glycyrrhizae</i> (Gancao) 6g<br>Formula 2: 生黄芪 <i>Astragalus mongholicus</i> Bunge (Shenghuangqi) 15g, 白术 <i>Rhizoma Atractylodis Macrocephalae</i> (Baizhu) 15g, 防风 <i>Saposhnikoviae Radix</i> (Fangfeng) 9g, 藿香 <i>Herba Agastaches</i> (Huoxiang) 9g, 苏叶 | 3 d | 1st | <a href="https://mp.weixin.qq.com/s/TEbHrEdw170n0c3Dto8bw">https://mp.weixin.qq.com/s/TEbHrEdw170n0c3Dto8bw</a>                     |

|                |           |                              |   |                                                                                                                                                                                                                                                                                                                                                                                                                                      |       |     |                                                                                                                                                       |
|----------------|-----------|------------------------------|---|--------------------------------------------------------------------------------------------------------------------------------------------------------------------------------------------------------------------------------------------------------------------------------------------------------------------------------------------------------------------------------------------------------------------------------------|-------|-----|-------------------------------------------------------------------------------------------------------------------------------------------------------|
|                |           |                              |   | <i>Folium Perillae</i> (Suye) 10g, 炙甘草 <i>Glycyrrhizae Radix Et Rhizoma Praeparata Cum Melle</i> (Zhigancao) 6g                                                                                                                                                                                                                                                                                                                      |       |     |                                                                                                                                                       |
| Chongqing      | 2020/2/1  | General population           | 1 | 生黄芪 <i>Astragalus mongholicus Bunge</i> (Shenghuangqi) 10g, 白术 <i>Rhizoma Atractylodis Macrocephalae</i> (Baizhu) 10g, 防风 <i>Saposhnikoviae Radix</i> (Fangfeng) 6g, 北沙参 <i>Radix Glehniae</i> (Beishashen) 15g, 芦根 <i>Rhizoma Phragmitis</i> (Lugen) 10g, 藿香 <i>Herba Agastaches</i> (Huoxiang) 12g, 连翘 <i>Fructus Forsythiae</i> (Lianqiao) 9g, 板蓝根 <i>Radix Isatidis (Banlangen)</i> 9g, 甘草 <i>Radix Glycyrrhizae</i> (Gancao) 3g | 3-5 d | 1st | <a href="https://www.cqcb.com/hot/2020-02-01/2137736_pc.html">https://www.cqcb.com/hot/2020-02-01/2137736_pc.html</a>                                 |
| Guizhou        | 2020/1/22 | General population; children | 3 | 北沙参 <i>Radix Glehniae</i> (Beishashen)10g, 玉竹 <i>Rhizoma Polygonati Odorati</i> (Yuzhu) 20g, 石斛 <i>Herba Dendrobii</i> (Shihu) 20g, 贯众 <i>Cyrtomium fortune J. Sm.</i> (Guanzhong) 20g, 苍术 <i>Atractylodis Rhizoma</i> (Cangzhu) 10g, 石菖蒲 <i>Rhizoma Acori Tatarinowii</i> (Shichangpu) 10g                                                                                                                                          | NR    | 1st | <a href="http://www.gz.xinhuanet.com/2020-01/22/c_1125494617.htm">http://www.gz.xinhuanet.com/2020-01/22/c_1125494617.htm</a>                         |
| Xizang (Tibet) | 2020/1/26 | General population           | 6 | 催汤丸 Cuitang pill, 七味珍宝汤(散) Qiwei Zhenbao decotion (powder), 四味木香汤(散) Siwei Muxiang decotion (powder), 仁青常觉 Renqing Changjue pill, 仁青芒觉 Renqing Mangjue pill, 流感丸 Liugan pill                                                                                                                                                                                                                                                         | NR    | 1st | <a href="http://app.myzaker.com/news/article.php?pk=5e2f9f06b15ec02f0b359ed5">http://app.myzaker.com/news/article.php?pk=5e2f9f06b15ec02f0b359ed5</a> |

Note: **NR**: not report.
